# Supplementary material for: Interface connection of functionalized carbon nanotubes for efficient and stable perovskite solar cells
Source: Royal Society of Chemistry journal article supplement (doi:10.1039/d3ta02030d), 2023-01-01
Supplement: d3ta02030d1.pdf [file d3ta02030d1.pdf]

**Interface Connection of Functionalized Carbon Nanotubes  
for Efficient and Stable Perovskite Solar Cells**

*Guang Shao*<sup>1,3,7\*</sup>, *Hui-Juan Yu*<sup>1,3</sup>, *Dian Wang*<sup>1</sup>, *Jing Xiao*<sup>1,3</sup>, *Zhi-Lan Yu*<sup>1,3</sup>, *Jun-Feng Qu*<sup>1,3</sup>, *Jian Chen*<sup>1</sup>, *Qurat Ul Ain*,<sup>4</sup> *Ammar Ahmed Khan*,<sup>4</sup> *Zeliang Qiu*,<sup>5</sup> *Ruiyuan Hu*,<sup>6</sup> *Jianxing Xia*,<sup>2\*</sup> *Khalid A Alamry*,<sup>8</sup> and *Mohammad Khaja Nazeeruddin*,<sup>2\*</sup>

<sup>1</sup>*School of Chemistry, Sun Yat-sen University, Guangzhou, Guangdong 510006, China.*

<sup>2</sup>*Institute of Chemical Sciences and Engineering, Ecole Polytechnique Federale de Lausanne (EPFL), CH-1951 Sion, Switzerland.*

<sup>3</sup>*Shenzhen Research Institute, Sun Yat-sen University, Shenzhen 518057, China.*

<sup>4</sup>*School of Science and Engineering, Lahore University of Management Sciences, Lahore, Punjab, 54000, Pakistan.*

<sup>5</sup>*College of Materials and Chemistry and Chemical Engineering, Chengdu University of Technology, Chengdu, Sichuan 610059, China.*

<sup>6</sup>*New Energy Technology Engineering Laboratory of Jiangsu Province, School of Science, Nanjing University of Posts and Telecommunications (NJUPT), Nanjing 210023, China.*

<sup>7</sup>*Center for Organic Photonics and Electronics Research (OPERA), Kyushu University, Fukuoka 819-0395, Japan.*

<sup>8</sup>*Center of Excellence for Advanced Materials Research (CEAMR), King Abdulaziz University, P.O. Box 80203, 21589 Jeddah, Saudi Arabia.*

**Materials for PSCs fabrication:**

4-Tertbutylpyridine (tbp), bis(trifluoromethane) sulfonamide lithium salt, and FK209 [tris(2-(1H-

pyrazol-1-yl)-4-tert-butylpyridine)-cobalt(III) tris(bis(trifluoromethylsulfonyl) imide)], chlorobenzene (CB), dimethylsulphoxide (DMSO), isopropanol (IPA) and dimethylformamide (DMF) were supplied from Sigma-Aldrich. PEAI, FAI, MAI and  $\text{PbBr}_2$  were purchased from GreatCell Solar. Lead iodide was purchased from Alfa Aesa. Spiro-OMeTAD was purchased from Merck. The  $\text{SnO}_2$  nanoparticle was supplied from Alfa Aesa. All of the purchased chemicals were used as received without further purification.

*Device fabrication:*

The chemically etched FTO glass (Nippon Sheet Glass) was cleaned with a detergent solution, acetone, and ethanol.  $\text{SnO}_2$  nanoparticle was diluted in deionized water with a volume ratio of 1:4 and coated on the FTO substrate at a speed of 3000 rpm for 20 s with a ramp-up of 2000 rpm  $\text{s}^{-1}$ , finally heating at 150 °C for 10 min; The CNT layer was dispersed in DMF with various concentrations and dynamic spin-coating on the  $\text{SnO}_2$  layer at a speed of 4000 rpm for 20 s with a ramp-up of 3000 rpm  $\text{s}^{-1}$  finally heating at 100 °C for 10 min, and then perovskite solutions (The molar ratio of  $\text{PbI}_2$ , MAI, FAI,  $\text{PbBr}_2$  is 1: 0.16: 0.84: 0.11, the molar of  $\text{PbI}_2$  is 1.38 mmol/mL, the MAI is 0.305 mmol/mL which added in to the perovskite solution; The solvent is composed by DMSO and DMF with a ratio of 1:4) are successively spin-coated on the substrates at 1000 rpm for 10s and 5000 rpm for the 30s, respectively. 200  $\mu\text{L}$  of chlorobenzene was dropped in 10 s at 5000 rpm. Perovskite films were annealed at 150 °C for 10 min. The 10 mg PEAI was dissolved in 1 mL IPA and spin-coated on perovskite film at 3000 rpm for the 20s. The HTM solution was prepared by dissolving 75 mg of Spiro-OMeTAD (Merck) with additives in 1 mL of chlorobenzene. As additives, 18  $\mu\text{L}$  of Li-bis(trifluoromethanesulfonyl) imide from the stock solution (520 mg in 1 mL of acetonitrile), 13  $\mu\text{L}$  of FK209 [tris(2-(1H-pyrazol-1-yl)-4-tert-butylpyridine)-cobalt(III) tris(bis (trifluoromethylsulfonyl)imide) (375 mg in 1 mL of

acetonitrile), and 30  $\mu\text{L}$  of 4-tert-butylpyridine were added. The Spiro-OMeTAD layer was formed by spin-coating the solution at 4000 rpm for 20 s and followed by the deposition of the 70 nm thick Au electrode by thermal evaporation.

*Devices and films Characterization:*

For the PL lifetime measurements, samples are excited with a 408 nm pulsed laser (MDL 300, PicoQuant) with  $40 \mu\text{m cm}^{-2}$  pulse energy density. The current density-voltage (J-V) curves of electron-only devices and photovoltaic devices were measured using a Keithley 4200-SCS semiconductor parameter analyzer. The photovoltaic devices were measured under AM 1.5 G one sun illumination ( $100 \text{ mW/cm}^2$ ) with a solar simulator (Newport 94021A) calibrated by a Si-reference cell certified by NREL. The cells were masked with the active area of  $0.09 \text{ cm}^2$  to fix the active area and reduce the influence of the scattered light for the small device. All measurements were characterized at room temperature in the air. IPCE spectra were recorded as a function of wavelength under a constant white light bias of  $\approx 10 \text{ mW cm}^{-2}$  supplied by an array of white light emitting diodes. The excitation beam from a 300 W xenon lamp (ILC Technology) was focused through a Gemini-180 double monochromator (Jobin Yvon Ltd) and chopped at  $\approx 2 \text{ Hz}$ . The signal was recorded using a Model SR830 DSP Lock-In Amplifier (Stanford Research Systems).

*DFT calculations:*

The calculation of geometry optimization of CNT was performed by the Gaussian 09W program using the B3LYP exchange-correlation functional.<sup>1</sup> The calculation was performed by Vienna Ab-initio Simulation Program (VASP) package by employing a PAW-PBE pseudopotentials.<sup>2-4</sup> The optimizations of the lattice constants and the atomic coordinates were made by the minimization of

the total energy with k-points of  $2 \times 2 \times 2$ . All the atoms were allowed to relax until all internal atomic forces were within  $0.005 \text{ eV/\AA}$ , and the plane-wave cutoff energy was set as  $600 \text{ eV}$ .

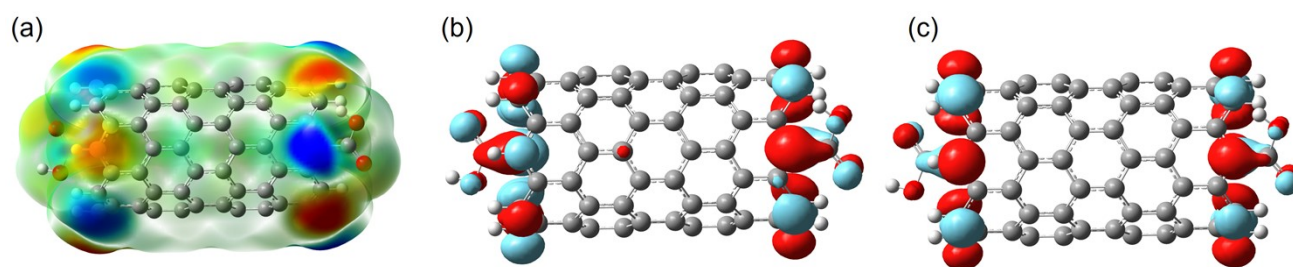

Figure S1. The optimized geometry of CNTs and its electronic properties. (a) ESP; (b) LUMO; (c) HOMO.

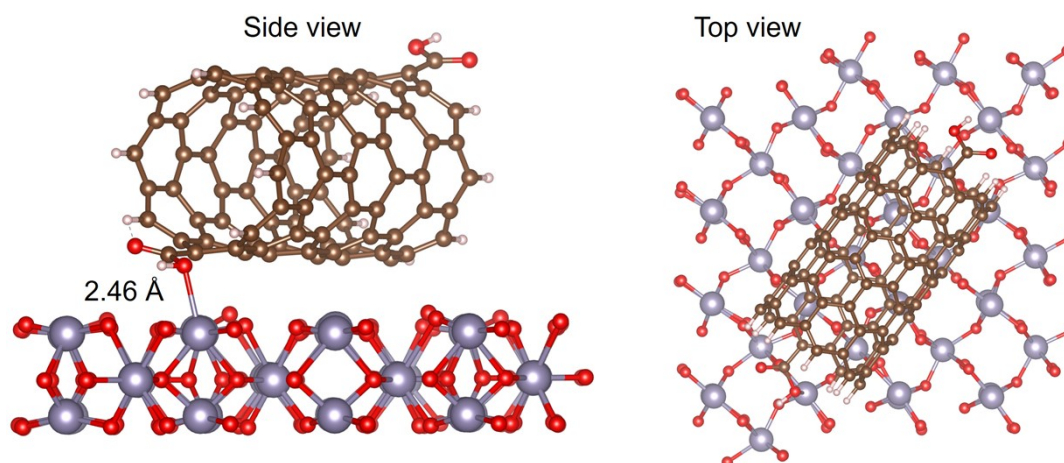

Figure S2. The optimized geometry of CNTs interacted with  $\text{SnO}_2$  (001) surface.

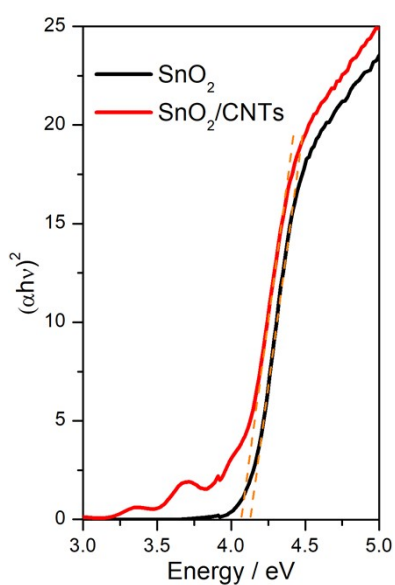

Figure S3. Tauc plots of  $\text{SnO}_2$  films with or without the CNTs modification.

Table S1. Fitting parameters of *bi*-exponential decay function in TRPL of FTO/SnO<sub>2</sub>/Perovskite with or without the CNT modification.

| Films                                | Fraction A <sub>1</sub> | τ <sub>1</sub> (ns) | Fraction A <sub>2</sub> | τ <sub>2</sub> (ns) | Average decay time τ (ns) <sup>a</sup> |
|--------------------------------------|-------------------------|---------------------|-------------------------|---------------------|----------------------------------------|
| FTO/SnO <sub>2</sub> /Perovskite     | 54.7%                   | 4.5                 | 45.3%                   | 221.5               | 216.3                                  |
| FTO/SnO <sub>2</sub> /CNT/Perovskite | 52.6%                   | 3.5                 | 47.4%                   | 150.1               | 146.5                                  |

<sup>a</sup> Average decay time is calculated according to the equation:  $\tau = (A_1\tau_1^2 + A_2\tau_2^2)/(A_1\tau_1 + A_2\tau_2)$ .

Table S2. The details photovoltaic parameters of PSCs with or without the CNT modification under the reverse and forward scans.

| CNTs               | J <sub>sc</sub> [mA cm <sup>-2</sup> ] | V <sub>oc</sub> [V] | FF    | PCE [%] |
|--------------------|----------------------------------------|---------------------|-------|---------|
| 0 mg/mL Reverse    | 24.90                                  | 1.122               | 0.807 | 22.54   |
| 0 mg/mL Forward    | 24.95                                  | 1.095               | 0.796 | 21.74   |
| 0.07 mg/mL Reverse | 24.95                                  | 1.161               | 0.830 | 24.04   |
| 0.07 mg/mL Forward | 24.99                                  | 1.145               | 0.823 | 23.54   |

### Reference:

1. M. J. Frisch, G. W. Trucks, H. B. Schlegel, G. E. Scuseria, M. A. Robb, J. R. Cheeseman, J. A. Montgomery Jr., T. Vreven, K. N. Kudin, J. C. Burant, J. M. Millam, S. S. Iyengar, J. Tomasi, V. Barone, B. Mennucci, M. Cossi, G. Scalmani, N. Rega, G. A. Petersson, H. Nakatsuji, M. Hada, M.

Ehara, K. Toyota, R. Fukuda, J. Hasegawa, M. Ishida, T. Nakajima, Y. Honda, O. Kitao, H. Nakai, M. Klene, X. Li, J. E. Knox, H. P. Hratchian, J. B. Cross, V. Bakken, C. Adamo, J. Jaramillo, R. Gomperts, R. E. Stratmann, O. Yazyev, A. J. Austin, R. Cammi, C. Pomelli, J. W. Ochterski, P. Y. Ayala, K. Morokuma, G. A. Voth, P. Salvador, J. J. Dannenberg, V. G. Zakrzewski, S. Dapprich, A. D. Daniels, M. C. Strain, O. Farkas, D. K. Malick, A. D. Rabuck, K. Raghavachari, J. B. Foresman, J. V. Ortiz, Q. Cui, A. G. Baboul, S. Clifford, J. Cioslowski, B. B. Stefanov, G. Liu, A. Liashenko, P. Piskorz, I. Komaromi, R. L. Martin, D. J. Fox, T. Keith, M. A. Al-Laham, C. Y. Peng, A. Nanayakkara, M. Challacombe, P. M. W. Gill, B. Johnson, W. Chen, M. W. Wong, C. Gonzalez, J. A. Pople, Gaussian 09, Revision A.02, Gaussian, Inc. 2009, Wallingford, CT.

2. G. Kresse and J. Furthmüller, *Phys. Rev. B*, 1996, **54**, 11169.
3. G. Kresse and J. Furthmüller, *Comput. Mat. Sci.*, 1996, **6**, 15.
4. J. P. Perdew, K. Burke, M. Ernzerhof, *Phys. Rev. Lett.*, 1996, **77**, 3865.
